# Supplementary material for: Is home where the heat is? comparing residence-based with mobility-based measures of heat exposure in San Diego, California
Source: Springer Nature journal article supplement (doi:10.1038/s41370-024-00715-5), 2024-09-11
Supplement: MOESM1 [file 41370_2024_715_MOESM1_ESM.pdf]

*Supplement to*

**Is home where the heat is? comparing residence-based with mobility-based measures of heat exposure in San Diego, California**

Revised May 6, 2024

**Table of Contents**

*eFigure 1: Home census tracts.....2*

*eFigure 2: Map of total time spent (hours) in census tracts by participants.....3*

*eTable 1. LandSat images used in analysis .....4*

eFigure 1: Home census tracts

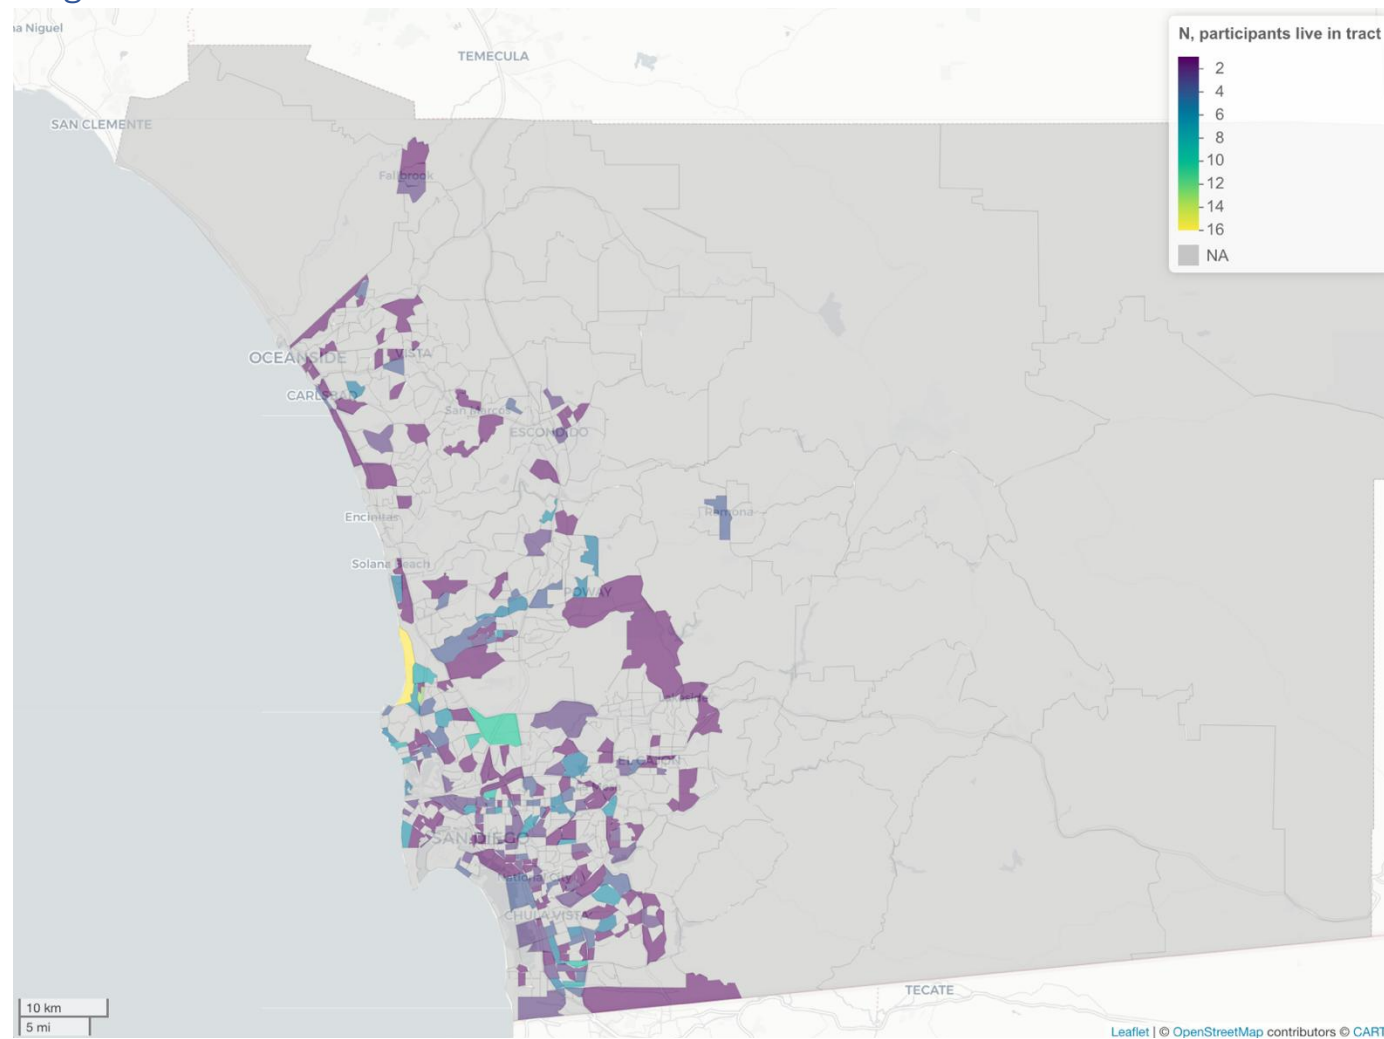

**eFigure 1.** Map of home census tracts of study participants, where home census tract is defined as that in which the participant spent the most time.

eFigure 2: Map of share of total person-time spent in census tracts by all participants.

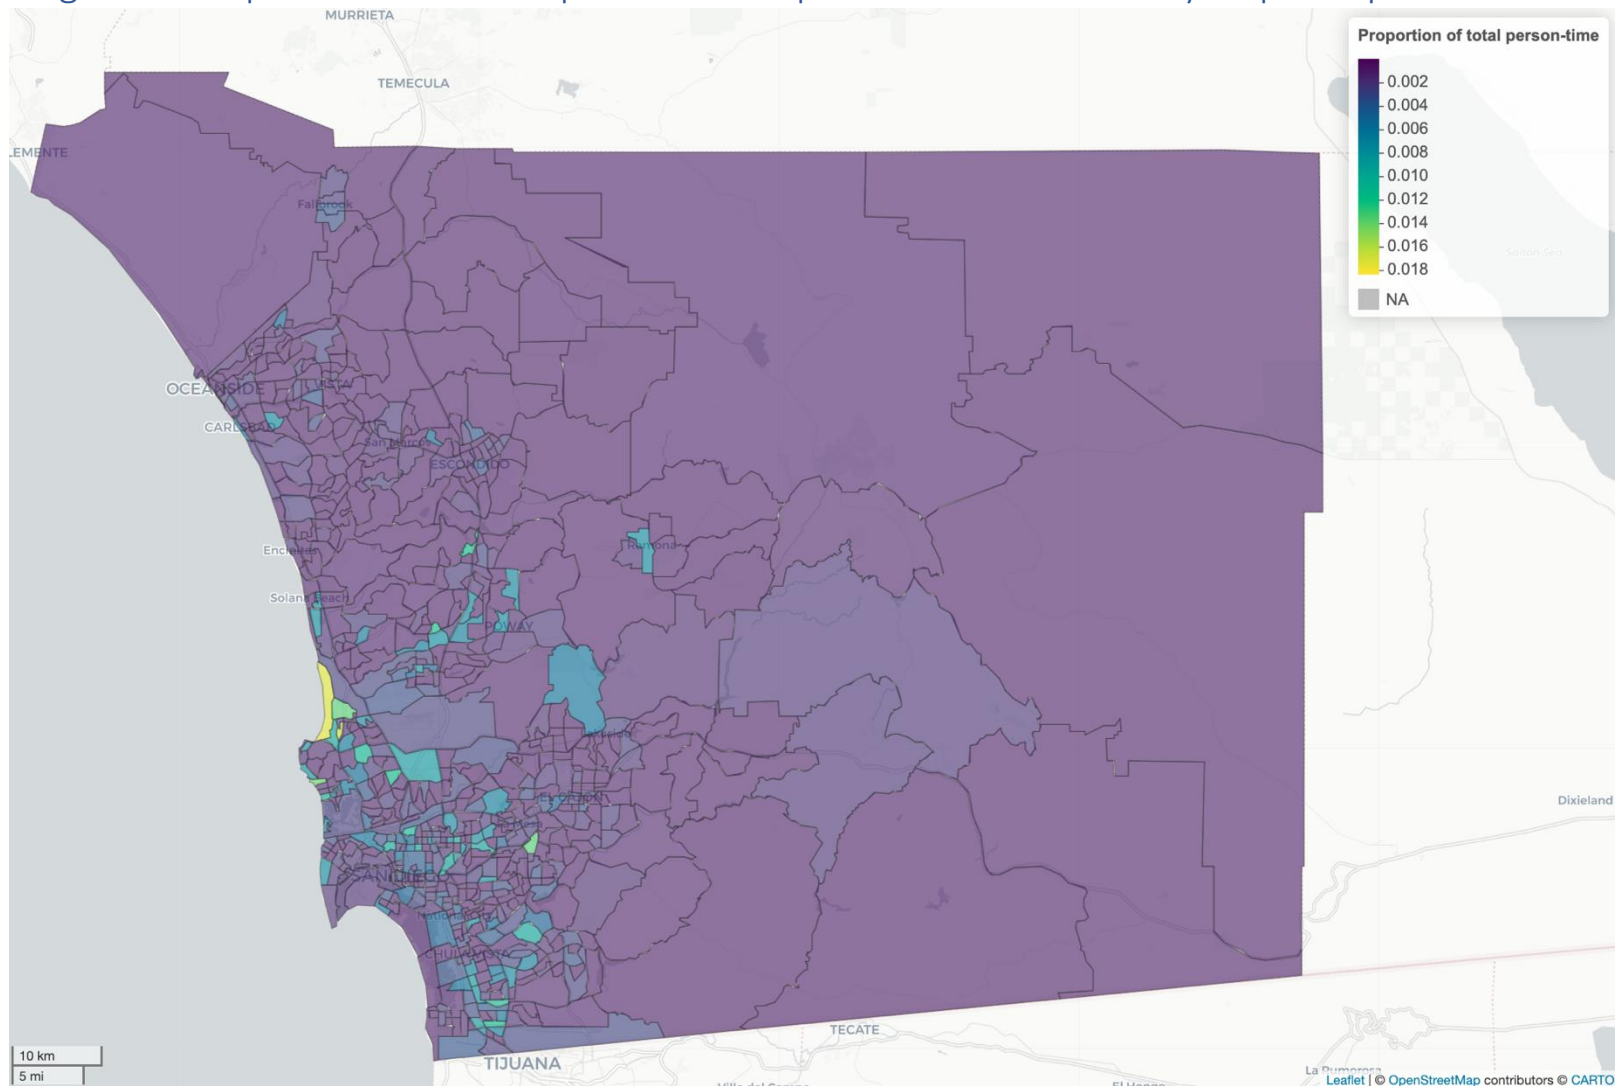

eFigure 2. Map of share of total person-time spent in census tracts by all participants.

**eTable 1.** LandSat images used in analysis

| eTable 1. LandSat images used in analysis           |            |         |                          |
|-----------------------------------------------------|------------|---------|--------------------------|
| Image identifier                                    | Image date | Measure | Percent land cloud cover |
| LC08_L2SP_040037_20140930_20200910_02_T1_ST_B10.TIF | 2014-09-30 | ST_B10  | 0.03                     |
| LC08_L2SP_040037_20141117_20200910_02_T1_ST_B10.TIF | 2014-11-17 | ST_B10  | 0.05                     |
| LC08_L2SP_040037_20141219_20200910_02_T1_ST_B10.TIF | 2014-12-19 | ST_B10  | 0.18                     |
| LC08_L2SP_040037_20150104_20200910_02_T1_ST_B10.TIF | 2015-01-04 | ST_B10  | 2.16                     |
| LC08_L2SP_040037_20150205_20200909_02_T1_ST_B10.TIF | 2015-02-05 | ST_B10  | 0.85                     |
| LC08_L2SP_040037_20150309_20200909_02_T1_ST_B10.TIF | 2015-03-09 | ST_B10  | 0.19                     |
| LC08_L2SP_040037_20150325_20200909_02_T1_ST_B10.TIF | 2015-03-25 | ST_B10  | 0.08                     |
| LC08_L2SP_040037_20150512_20200909_02_T1_ST_B10.TIF | 2015-05-12 | ST_B10  | 2.62                     |
| LC08_L2SP_040037_20150715_20200908_02_T1_ST_B10.TIF | 2015-07-15 | ST_B10  | 0.04                     |
| LC08_L2SP_040037_20150816_20200909_02_T1_ST_B10.TIF | 2015-08-16 | ST_B10  | 0.35                     |
| LC08_L2SP_040037_20150917_20200908_02_T1_ST_B10.TIF | 2015-09-17 | ST_B10  | 0.46                     |
| LC08_L2SP_040037_20151003_20200908_02_T1_ST_B10.TIF | 2015-10-03 | ST_B10  | 1.39                     |
| LC08_L2SP_040037_20151120_20200908_02_T1_ST_B10.TIF | 2015-11-20 | ST_B10  | 0.13                     |
| LC08_L2SP_040037_20160208_20200907_02_T1_ST_B10.TIF | 2016-02-08 | ST_B10  | 0.17                     |
| LC08_L2SP_040037_20160224_20200907_02_T1_ST_B10.TIF | 2016-02-24 | ST_B10  | 0.11                     |
| LC08_L2SP_040037_20160327_20200907_02_T1_ST_B10.TIF | 2016-03-27 | ST_B10  | 2.46                     |
| LC08_L2SP_040037_20160717_20200906_02_T1_ST_B10.TIF | 2016-07-17 | ST_B10  | 0.47                     |
| LC08_L2SP_040037_20160802_20200906_02_T1_ST_B10.TIF | 2016-08-02 | ST_B10  | 0.59                     |
| LC08_L2SP_040037_20160903_20200906_02_T1_ST_B10.TIF | 2016-09-03 | ST_B10  | 0.65                     |
| LC08_L2SP_040037_20161021_20200905_02_T1_ST_B10.TIF | 2016-10-21 | ST_B10  | 0.03                     |

| <b>eTable 1.</b> LandSat images used in analysis    |            |         |                          |
|-----------------------------------------------------|------------|---------|--------------------------|
| Image identifier                                    | Image date | Measure | Percent land cloud cover |
| LC08_L2SP_040037_20161106_20200905_02_T1_ST_B10.TIF | 2016-11-06 | ST_B10  | 0.98                     |
| LC08_L2SP_040037_20161122_20200905_02_T1_ST_B10.TIF | 2016-11-22 | ST_B10  | 0.17                     |
| LC08_L2SP_040037_20161208_20200905_02_T1_ST_B10.TIF | 2016-12-08 | ST_B10  | 0.24                     |
| LC08_L2SP_040037_20170125_20200905_02_T1_ST_B10.TIF | 2017-01-25 | ST_B10  | 2.06                     |
| LC08_L2SP_040037_20170314_20200904_02_T1_ST_B10.TIF | 2017-03-14 | ST_B10  | 0.38                     |
| LC08_L2SP_040037_20170330_20200904_02_T1_ST_B10.TIF | 2017-03-30 | ST_B10  | 0.54                     |
| LC08_L2SP_040037_20170415_20200904_02_T1_ST_B10.TIF | 2017-04-15 | ST_B10  | 0.10                     |
| LC08_L2SP_040037_20170501_20200904_02_T1_ST_B10.TIF | 2017-05-01 | ST_B10  | 0.04                     |
| LC08_L2SP_040037_20170602_20200903_02_T1_ST_B10.TIF | 2017-06-02 | ST_B10  | 0.92                     |
| LC08_L2SP_040037_20170618_20200903_02_T1_ST_B10.TIF | 2017-06-18 | ST_B10  | 0.64                     |
| LC08_L2SP_040037_20170704_20200903_02_T1_ST_B10.TIF | 2017-07-04 | ST_B10  | 0.24                     |
| LC08_L2SP_040037_20170805_20200903_02_T1_ST_B10.TIF | 2017-08-05 | ST_B10  | 0.51                     |
| LC08_L2SP_040037_20170821_20201015_02_T1_ST_B10.TIF | 2017-08-21 | ST_B10  | 0.04                     |
| LC08_L2SP_040037_20170906_20200903_02_T1_ST_B10.TIF | 2017-09-06 | ST_B10  | 2.55                     |
| LC08_L2SP_040037_20171008_20200903_02_T1_ST_B10.TIF | 2017-10-08 | ST_B10  | 0.89                     |
